# Supplementary material for: Has carbon finance been able to promote clean energy development? — a low-carbon technology innovation perspective
Source: Frontiers journal article supplement (doi:10.3389/fenvs.2025.1528983), 2025-07-22
Supplement: Table_1.xlsx [file Table_1.xlsx]

## Sheet: Sheet1
year	CAF	CLE	PGDP	LCTI	EF	FDI	CS	IND	GOV	MARK	province
2010	-0.192831	5.59471	11.2684	2.80829	2.09443	5.51556	4.45385	3.07296	2.89917	2.14815	Beijing
2011	-0.176543	5.57208	11.365	2.88585	2.13477	5.54799	4.45672	3.0316	2.9381	2.17202	Beijing
2012	-0.0681094	5.67264	11.4377	2.85055	2.12088	5.58105	4.45773	3.00906	2.96379	2.1478	Beijing
2013	0.0310337	5.81714	11.5186	2.76114	2.11759	5.60068	4.45885	2.98177	2.98305	2.15848	Beijing
2014	0.0888536	5.89707	11.5781	2.885	2.11651	5.63625	4.46014	2.96198	2.98244	2.18684	Beijing
2015	0.070649	6.04263	11.6412	3.04034	2.13852	5.68344	4.46258	2.88126	3.14223	2.18245	Beijing
2016	0.173448	6.07394	11.7231	3.13758	2.11334	5.71706	4.46318	2.84807	3.16516	2.18549	Beijing
2017	0.185378	5.96204	11.8217	3.13019	2.11616	5.75073	4.46516	2.82715	3.1284	2.22808	Beijing
2018	0.189526	6.11025	11.9248	2.87113	2.10755	5.77784	4.46697	2.80609	3.11654	2.22051	Beijing
2019	0.27143	6.14008	11.994	2.8606	2.15334	5.77458	4.46995	2.77192	3.03977	2.21833	Beijing
2020	0.297711	6.12571	12.0086	2.67875	2.20863	5.78521	4.47217	2.77053	2.9856	2.21605	Beijing
2021	0.427739	6.15819	12.1417	2.71631	2.197	5.83127	4.47734	2.89048	2.86528	2.22311	Beijing
2022	0.488623	6.24213	12.1548	3.77211	2.23514	5.8414	4.47244	2.76465	2.58025	2.22343	Beijing
2023	1.73721	6.29873	12.2076	4.01842	2.25129	6.6796	4.47541	2.70217	2.90232	2.25255	Beijing
2010	-0.29811	6.37856	10.8702	2.86425	1.67991	4.86121	4.15025	3.86536	3.00352	2.13854	Tianjin
2011	-0.305719	6.43143	11.0103	2.89483	1.73481	4.77491	4.15795	3.8352	3.09751	2.15548	Tianjin
2012	-0.216126	6.37961	11.0917	2.82217	1.74904	4.74415	4.40143	3.82242	3.16548	2.14838	Tianjin
2013	-0.196115	6.43657	11.1639	2.53661	1.7784	4.73734	4.41	3.79128	3.24384	2.15848	Tianjin
2014	-0.071953	6.43858	11.218	2.5212	1.78354	4.74554	4.41371	3.76991	3.29991	2.19444	Tianjin
2015	0.166486	6.43455	11.2333	2.51631	1.7949	4.81039	4.41769	3.72005	3.3915	2.23302	Tianjin
2016	0.0239771	6.42576	11.284	2.56873	1.76396	4.89328	4.42243	3.63911	3.47299	2.30956	Tianjin
2017	0.102646	6.4151	11.3885	2.60267	1.71208	4.9372	4.4254	3.60162	3.27202	2.39215	Tianjin
2018	0.2554	6.56733	11.4786	2.36909	1.67	5.01655	4.4302	3.58863	3.14511	2.39926	Tianjin
2019	0.266478	6.59712	11.5277	2.16262	1.71996	5.02978	4.44074	3.56098	3.23071	2.34746	Tianjin
2020	0.456229	6.64848	11.5228	1.94242	1.76196	5.02065	4.43147	3.55718	3.11337	2.33244	Tianjin
2021	0.42658	6.68427	11.6461	2.01935	1.73023	5.01203	4.43319	3.58812	3.00067	2.3303	Tianjin
2022	0.479733	6.7942	11.6776	2.79827	1.74913	4.9847	4.94332	3.61153	2.42666	2.342	Tianjin
2023	1.30066	6.87381	11.7183	3.11162	1.75786	4.80917	4.60087	3.57639	2.9755	2.24252	Tianjin
2010	-0.676073	7.59746	10.1277	2.24941	0.905675	4.55713	3.78291	3.85119	2.75142	1.93831	Hebei
2011	-0.678362	7.75233	10.2945	2.5811	0.975599	4.47927	3.81966	3.87226	2.80588	1.94233	Hebei
2012	-0.5489	7.77102	10.3665	2.53541	1.00652	4.30757	3.8416	3.85688	2.87227	1.90613	Hebei
2013	-0.438297	7.82695	10.4129	2.40166	1.06257	4.2242	3.87158	3.83034	2.90014	1.93716	Hebei
2014	-0.371273	7.82401	10.4465	2.42966	1.05838	4.22112	3.89911	3.81831	2.92069	1.86547	Hebei
2015	-0.093711	7.82325	10.4896	2.54512	1.04396	4.22931	3.94488	3.77591	3.06037	1.85724	Hebei
2016	0.045159	7.87496	10.5612	2.5911	0.992438	4.28854	3.98655	3.7684	3.05616	1.8904	Hebei
2017	0.128223	7.94346	10.63	2.63466	0.968431	4.37651	4.0207	3.73056	3.07583	1.92556	Hebei
2018	0.19774	8.0498	10.6864	2.29029	0.947265	4.4134	4.04882	3.68164	3.16871	1.94147	Hebei
2019	0.17678	8.10097	10.7573	2.18313	0.961415	4.57471	4.07361	3.64522	3.16778	2.0271	Hebei
2020	0.248293	8.13888	10.7863	1.93207	0.969818	4.61393	4.09549	3.6434	3.22102	1.97422	Hebei
2021	0.375764	8.16435	10.899	1.9716	0.95984	4.6237	4.09767	3.70099	3.08663	2.033	Hebei
2022	0.525476	8.38348	10.942	2.34425	1.0126	4.65339	4.1216	3.69488	3.09265	2.09236	Hebei
2023	0.268113	8.78273	10.9904	2.73766	1.02962	5.16479	4.13957	3.62168	3.08461	2.13924	Hebei
2010	-0.83692	7.67369	10.1231	2.74415	0.947028	3.9849	3.87228	4.0957	3.07691	1.71506	Shanxi
2011	-0.787367	7.7596	10.3283	3.1089	0.933142	4.05439	3.90781	4.12649	3.07721	1.76985	Shanxi
2012	-0.520136	7.8058	10.4021	2.8917	1.002	4.09151	3.93808	4.07167	3.16206	1.74746	Shanxi
2013	-0.361502	7.87895	10.4315	2.74417	1.09634	4.16558	3.96803	4.02109	3.22994	1.74292	Shanxi
2014	-0.399413	7.88119	10.4424	2.92444	1.09394	4.21686	3.99452	3.96526	3.23905	1.69194	Shanxi
2015	-0.21241	7.80344	10.4233	3.1893	1.0625	4.09717	4.02303	3.78643	3.3645	1.69396	Shanxi
2016	-0.205938	7.83798	10.434	3.17645	0.988297	4.08648	4.04778	3.75664	3.35697	1.75751	Shanxi
2017	-0.00503983	7.94589	10.6278	3.04733	0.90215	4.03052	4.07056	3.82451	3.25557	1.81726	Shanxi
2018	-0.184751	8.0648	10.727	2.71906	0.820041	4.07005	4.09184	3.7917	3.29007	1.82519	Shanxi
2019	0.0425135	8.12019	10.7894	2.6288	0.959228	4.12228	4.11562	3.78462	3.32407	1.87518	Shanxi
2020	-0.0252362	8.16153	10.8416	2.3927	1.01036	4.14107	4.13565	3.76561	3.35534	1.80121	Shanxi
2021	0.278272	7.91562	11.0932	2.34888	0.991961	4.26014	4.14313	3.92444	3.09405	1.93109	Shanxi
2022	0.312704	8.12393	11.205	3.07413	1.06794	4.30298	4.15817	3.98854	3.13121	1.97088	Shanxi
2023	0.304327	8.4627	11.2118	2.02967	1.09861	4.30598	4.17399	3.94874	3.20739	1.90806	Shanxi
2010	-0.221391	7.81975	10.4094	2.52573	1.13449	3.60902	4.01707	3.73083	3.32237	1.82552	Inner Mongolia
2011	-0.187206	7.99727	10.553	2.77832	1.25939	3.5838	4.04113	3.75553	3.45331	1.82616	Inner Mongolia
2012	0.110947	8.04459	10.6571	2.91507	1.28829	3.43849	4.06636	3.77256	3.48804	1.78524	Inner Mongolia
2013	0.177661	8.17952	10.7452	2.66108	1.32106	3.37588	4.08979	3.75534	3.47691	1.80648	Inner Mongolia
2014	0.263456	8.25785	10.8127	2.43027	1.34892	3.41313	4.10867	3.73923	3.463	1.76883	Inner Mongolia
2015	0.860177	8.27614	10.8794	2.66953	1.3762	3.39014	4.12806	3.70609	3.49177	1.74397	Inner Mongolia
2016	0.801871	8.28142	10.9439	2.7013	1.35858	3.51512	4.14796	3.70043	3.48818	1.89326	Inner Mongolia
2017	0.486228	8.39749	11.0224	2.60436	1.35817	3.54183	4.16821	3.67452	3.41464	1.86206	Inner Mongolia
2018	0.619514	8.51779	11.1071	2.19462	1.3299	3.55849	4.1822	3.66997	3.39897	1.81775	Inner Mongolia
2019	0.405002	8.61161	11.1743	2.10871	1.35389	3.55649	4.1966	3.67102	3.38895	1.75872	Inner Mongolia
2020	0.377188	8.6675	11.1819	1.86728	1.39049	3.50526	4.21183	3.6896	3.41896	1.75906	Inner Mongolia
2021	0.965278	8.71931	11.3873	1.91353	1.37685	3.46574	4.21213	3.84335	3.20901	1.79059	Inner Mongolia
2022	0.91696	8.932	11.4866	1.58121	1.4082	3.46135	4.22828	3.88244	3.23521	1.82148	Inner Mongolia
2023	0.337445	9.0133	11.5396	2.72331	1.41099	4.16775	4.24248	3.86126	3.32082	1.75992	Inner Mongolia
2010	-0.571072	7.16635	10.3661	2.62389	1.23098	5.21368	4.15738	3.9451	3.13539	2.07317	Liaoning
2011	-0.330725	7.22251	10.528	2.80335	1.28062	5.20203	4.18848	3.9482	3.17312	2.10145	Liaoning
2012	-0.210611	7.25467	10.6164	2.92961	1.24491	5.19073	4.21448	3.90782	3.24026	2.11142	Liaoning
2013	-0.20537	7.3485	10.6921	2.87275	1.29612	5.1504	4.23335	3.86946	3.29796	2.1357	Liaoning
2014	-0.111274	7.40721	10.7353	3.0135	1.3082	5.14114	4.23189	3.80968	3.23356	2.14464	Liaoning
2015	-0.0476098	7.41758	10.7491	3.2614	1.32313	5.17869	4.24552	3.72059	3.09896	2.09937	Liaoning
2016	-0.0599566	7.48367	10.7606	3.28887	1.28126	5.13279	4.23222	3.65251	3.11115	2.08592	Liaoning
2017	-0.0182606	7.51167	10.8259	3.37047	1.22793	5.12889	4.24105	3.64791	3.11321	2.13842	Liaoning
2018	0.0634824	7.59221	10.9113	3.01632	1.14666	5.13744	4.25225	3.65038	3.12252	2.15466	Liaoning
2019	0.138967	7.63672	10.9702	2.9304	1.15737	5.07492	4.26575	3.64085	3.14044	2.14885	Liaoning
2020	0.118653	7.66634	10.9816	2.57916	1.19466	5.09111	4.27864	3.62202	3.15726	2.10621	Liaoning
2021	0.0954427	7.72205	11.0851	2.57023	1.17273	5.09761	4.28359	3.67569	3.08258	2.14077	Liaoning
2022	0.248877	7.82375	11.1331	2.64377	1.20788	5.0943	4.29052	3.70308	3.07179	2.1694	Liaoning
2023	0.384552	8.02735	11.1858	3.95205	1.25276	5.15257	4.29736	3.65955	3.07912	2.22484	Liaoning
2010	-1.15317	6.4045	10.0578	2.89453	0.766817	3.76329	3.81991	3.65783	3.32791	1.84798	Jilin
2011	-0.904107	6.56508	10.2536	3.19585	0.882916	3.76746	3.8712	3.63495	3.34871	1.89296	Jilin
2012	-0.880307	6.52854	10.3786	3.28447	0.936625	3.76073	3.84802	3.6429	3.34908	1.90434	Jilin
2013	-0.893143	6.6576	10.4727	3.18036	1.02164	3.77276	3.85015	3.63465	3.37121	1.93138	Jilin
2014	-0.53639	6.64863	10.538	3.06413	1.07046	3.77735	3.84374	3.64223	3.37521	1.94291	Jilin
2015	-0.515294	6.59441	10.5542	3.22807	1.10372	3.79256	3.8795	3.64569	3.46927	1.91619	Jilin
2016	-0.372716	6.63366	10.612	3.19015	1.08395	3.65144	3.89792	3.62211	3.53783	1.93845	Jilin
2017	-0.339182	6.68502	10.6745	3.31656	1.03303	3.69982	3.90399	3.59956	3.52965	1.99279	Jilin
2018	-0.380187	6.7313	10.7212	3.02798	0.998027	3.69337	3.89589	3.58355	3.51672	1.99102	Jilin
2019	-0.344845	6.85264	10.7769	2.95986	1.00592	3.71795	3.89589	3.56273	3.5128	2.03051	Jilin
2020	-0.245383	6.92641	10.8413	2.80767	1.00457	3.74927	3.89386	3.56239	3.51675	2.03614	Jilin
2021	-0.217664	6.93318	10.9228	2.95373	0.97952	3.7495	3.90197	3.58969	3.33518	2.12322	Jilin
2022	-0.216497	7.23672	10.9023	3.08881	1.06761	3.74266	4.16053	3.56703	3.86789	2.11167	Jilin
2023	0.2848	7.52233	10.963	3.35351	1.09861	3.9513	4.17008	3.52296	3.88228	2.01237	Jilin
2010	-1.46882	6.65599	9.98395	3.10463	0.820105	4.06285	4.01818	3.91008	3.3003	1.76849	Heilongjiang
2011	-1.33069	6.72689	10.1762	2.77015	0.832933	3.99379	4.03424	3.90166	3.33661	1.79824	Heilongjiang
2012	-1.35351	6.73709	10.2949	2.47907	0.862804	3.91979	4.0413	3.83504	3.36005	1.83848	Heilongjiang
2013	-1.20082	6.73257	10.3835	2.42411	0.94422	3.89671	4.06044	3.7821	3.34759	1.86625	Heilongjiang
2014	-1.02485	6.7814	10.4262	2.76774	0.986713	3.91522	4.08092	3.68972	3.33992	1.81986	Heilongjiang
2015	-0.810367	6.77308	10.4081	3.05601	1.01453	3.72545	4.10264	3.51429	3.53788	1.78289	Heilongjiang
2016	-0.775828	6.80285	10.4443	3.18127	0.972147	3.74408	4.11251	3.4346	3.57062	1.89687	Heilongjiang
2017	-0.820406	6.82141	10.4975	3.30138	0.886867	3.79414	4.12552	3.35283	3.62946	2.06964	Heilongjiang
2018	-0.773135	6.93655	10.5613	3.0988	0.830349	3.91761	4.15104	3.3151	3.5947	2.07543	Heilongjiang
2019	-0.776031	7.01383	10.6361	3.03165	0.828953	3.96954	4.16821	3.29121	3.61094	2.03196	Heilongjiang
2020	-0.717038	7.03689	10.6688	2.78177	0.844731	4.13964	4.18358	3.23099	3.68815	1.91501	Heilongjiang
2021	-0.674748	7.09052	10.7695	2.79099	0.838695	4.0755	4.18358	3.31431	3.5368	2.06382	Heilongjiang
2022	-0.557737	7.25362	10.8376	3.14876	0.89512	4.06954	4.19268	3.37542	3.52619	2.07631	Heilongjiang
2023	-0.0239597	7.78378	10.8513	3.37197	0.916291	4.11268	4.20492	3.29645	3.5937	1.95967	Heilongjiang
2010	-0.270832	6.77558	11.2618	2.65623	2.11218	6.32195	4.49189	3.72569	2.91431	2.24177	Shanghai
2011	-0.258854	6.85566	11.3496	2.94965	2.16142	6.38	4.492	3.70934	2.97374	2.24834	Shanghai
2012	-0.126497	6.78694	11.3943	3.0952	2.14065	6.42099	4.492	3.64717	2.97747	2.24305	Shanghai
2013	-0.147363	6.86565	11.4594	3.0849	2.11766	6.46789	4.49536	3.57547	2.97126	2.24612	Shanghai
2014	-0.0745722	6.67494	11.5369	3.13565	2.0861	6.536	4.49536	3.53119	2.96957	2.29747	Shanghai
2015	0.0780662	6.67582	11.6026	3.36845	2.09044	6.61854	4.47278	3.44279	3.13671	2.33389	Shanghai
2016	0.174058	6.69368	11.7048	3.44272	2.08287	6.67721	4.49536	3.35604	3.14201	2.30936	Shanghai
2017	0.170566	6.75606	11.802	3.34659	2.08144	6.73349	4.47392	3.36495	3.13217	2.32971	Shanghai
2018	0.212296	6.73304	11.8879	3.13856	2.09079	6.77194	4.47847	3.35935	3.14377	2.37639	Shanghai
2019	0.323513	6.7119	11.9389	3.11805	2.13341	6.81077	4.48074	3.28967	3.06951	2.40812	Shanghai
2020	0.334016	6.75895	11.9615	2.85178	2.17134	6.83435	4.492	3.27067	3.03467	2.41814	Shanghai
2021	0.440327	6.66454	12.0747	2.90827	2.14151	6.88082	4.49536	3.25958	2.96079	2.41886	Shanghai
2022	0.507447	6.98383	12.1035	3.02699	2.18779	6.89171	4.08358	3.24498	3.04624	2.43177	Shanghai
2023	1.61483	7.2083	12.1564	3.32662	2.19165	7.09872	4.08609	3.2025	3.01615	2.40731	Shanghai
2010	0.174175	8.11945	10.8703	1.65062	1.57975	6.24739	4.10429	3.96664	2.47438	2.21386	Jiangsu
2011	0.347738	8.23284	11.0166	1.70958	1.68278	6.2721	4.12713	3.94472	2.54468	2.24992	Jiangsu
2012	0.380884	8.27599	11.0995	1.79456	1.74916	6.22379	4.14313	3.92313	2.57158	2.21692	Jiangsu
2013	0.496783	8.37117	11.1906	2.12748	1.78463	6.22484	4.16511	3.89416	2.57566	2.22376	Jiangsu
2014	0.546606	8.37737	11.2682	2.10516	1.7913	6.24677	4.1851	3.86895	2.57021	2.32835	Jiangsu
2015	0.739528	8.38046	11.3586	2.66649	1.82166	6.28322	4.21213	3.8466	2.60974	2.34449	Jiangsu
2016	0.842161	8.45731	11.4327	2.87501	1.81407	6.32683	4.23266	3.81335	2.5576	2.36057	Jiangsu
2017	0.907208	8.49999	11.5322	2.90552	1.83736	6.37293	4.25135	3.81908	2.51517	2.37584	Jiangsu
2018	1.00562	8.53407	11.6115	2.61646	1.81875	6.38533	4.26549	3.81109	2.52628	2.37332	Jiangsu
2019	1.21912	8.54994	11.6656	2.53539	1.86364	6.43551	4.28359	3.78646	2.54512	2.35878	Jiangsu
2020	1.26144	8.55978	11.7058	2.22033	1.89487	6.44621	4.29592	3.77075	2.58836	2.26582	Jiangsu
2021	1.46729	8.69432	11.8352	2.37366	1.86815	6.47146	4.30407	3.80386	2.51966	2.26758	Jiangsu
2022	1.57829	8.9372	11.8741	2.76843	1.93215	6.47817	4.30946	3.81736	2.49556	2.27686	Jiangsu
2023	1.13206	9.327	11.9217	3.18474	1.93874	6.48206	4.31749	3.79287	2.56721	2.44183	Jiangsu
2010	0.286203	7.85102	10.8258	1.72121	1.60378	5.66188	3.43197	3.9437	2.46024	2.28991	Zhejiang
2011	0.383465	7.92927	10.9541	1.94829	1.66312	5.67976	4.13196	3.93337	2.49013	2.29918	Zhejiang
2012	0.510105	7.9047	11.0101	1.77672	1.70467	5.69019	4.14155	3.90322	2.49359	2.19822	Zhejiang
2013	0.627072	7.98678	11.0752	1.74367	1.7222	5.726	4.15732	3.88463	2.53927	2.19956	Zhejiang
2014	0.584558	7.96738	11.1266	1.959	1.70189	5.73673	4.17439	3.89025	2.55656	2.26301	Zhejiang
2015	0.721725	8.01003	11.194	2.29604	1.7062	5.79234	4.19419	3.85784	2.72624	2.26861	Zhejiang
2016	0.764433	8.07017	11.2622	2.48495	1.67247	5.84186	4.21509	3.821	2.69186	2.28849	Zhejiang
2017	0.876592	8.10541	11.3496	2.59847	1.67283	5.92484	4.23266	3.79237	2.66514	2.30787	Zhejiang
2018	0.894631	8.14277	11.4346	2.43679	1.64822	5.99623	4.2485	3.7758	2.69987	2.33554	Zhejiang
2019	1.00162	8.17122	11.4925	2.47678	1.68105	6.0666	4.2711	3.74016	2.77849	2.35061	Zhejiang
2020	1.16045	8.16942	11.5131	2.54445	1.71797	6.08732	4.27944	3.70748	2.74633	2.34469	Zhejiang
2021	1.22467	8.34818	11.637	2.50159	1.69509	6.12953	4.28496	3.74014	2.69977	2.35707	Zhejiang
2022	1.46739	8.48783	11.6869	2.62493	1.73937	6.15154	4.29561	3.75482	2.65446	2.37973	Zhejiang
2023	1.2984	8.89489	11.7361	2.83414	1.74047	5.94803	4.30712	3.71671	2.70564	2.38204	Zhejiang
2010	-0.525095	7.27507	10.0098	1.93709	0.635906	4.03123	3.76584	3.87686	2.97192	1.95515	Anhui
2011	-0.312602	7.39961	10.2135	1.82444	0.770212	3.99397	3.80221	3.91774	3.00976	2.00431	Anhui
2012	-0.27155	7.47732	10.3314	1.95691	0.888613	3.79908	3.83514	3.92039	3.07249	1.98705	Anhui
2013	-0.0365157	7.58581	10.4451	2.16124	0.981566	3.79908	3.86849	3.90631	3.05076	2.0117	Anhui
2014	0.0884526	7.61772	10.5335	2.37166	1.02327	3.85461	3.89813	3.88709	3.03067	2.0381	Anhui
2015	0.213129	7.63143	10.5877	2.9411	1.07613	3.92454	3.93124	3.81726	3.09031	2.05194	Anhui
2016	0.19642	7.71988	10.683	3.2219	1.07939	4.0162	3.9631	3.77918	3.04422	2.07932	Anhui
2017	0.387864	7.8064	10.7995	3.06198	1.06655	4.1166	3.99434	3.75495	3.03999	2.113	Anhui
2018	0.540374	7.9137	10.9327	2.92404	1.06898	4.19132	4.01908	3.72427	2.96133	2.17917	Anhui
2019	0.615593	7.96786	11.0101	2.89733	1.13091	4.36983	4.0434	3.70448	2.99886	2.19132	Anhui
2020	0.649705	7.94058	11.0404	2.8851	1.21607	4.41655	4.06612	3.68835	2.97734	2.13889	Anhui
2021	0.60221	8.03378	11.151	2.7339	1.21267	4.44147	4.07073	3.70137	2.8811	2.16768	Anhui
2022	0.809954	8.36464	11.1968	2.81657	1.26674	4.43165	4.09684	3.72002	2.92324	2.18143	Anhui
2023	0.350789	8.47534	11.249	2.87117	1.27257	4.52176	4.1192	3.69162	3.11445	2.21855	Anhui
2010	-0.829188	7.21253	10.6121	1.91343	1.29673	5.45801	4.04494	3.93886	2.42469	2.16286	Fujiang
2011	-0.571005	7.36546	10.7653	2.18591	1.4181	5.4692	4.06239	3.95118	2.50701	2.18448	Fujiang
2012	-0.490268	7.39179	10.8698	2.27846	1.49097	5.45451	4.08274	3.95389	2.55834	2.09186	Fujiang
2013	-0.446419	7.48278	10.9669	2.05929	1.53342	5.46154	4.10756	3.96005	2.61277	2.10181	Fujiang
2014	-0.315102	7.53552	11.0544	2.20275	1.56167	5.49397	4.12718	3.96618	2.58456	2.19967	Fujiang
2015	-0.196649	7.55014	11.1172	2.22988	1.59794	5.55663	4.14675	3.93604	2.70273	2.19933	Fujiang
2016	-0.150575	7.60461	11.2081	2.36827	1.60037	5.64725	4.165	3.90382	2.66996	2.22322	Fujiang
2017	0.0717791	7.69652	11.3296	2.54659	1.59599	5.64417	4.18633	3.87401	2.62764	2.23815	Fujiang
2018	0.0312595	7.82171	11.4539	2.2624	1.59417	5.70877	4.20445	3.88604	2.52505	2.26405	Fujiang
2019	0.208811	7.85475	11.5358	2.20361	1.66108	5.756	4.21767	3.85876	2.48466	2.33185	Fujiang
2020	0.363326	7.88271	11.5598	1.94933	1.73729	5.75694	4.23059	3.83403	2.48167	2.30777	Fujiang
2021	0.368805	7.98983	11.6817	2.10002	1.73836	5.78229	4.23411	3.85117	2.35143	2.32327	Fujiang
2022	0.495496	8.21623	11.7248	2.43843	1.78614	5.80097	4.25007	3.85481	2.37173	2.32855	Fujiang
2023	0.77334	8.46453	11.7745	2.69793	1.79176	5.71241	4.26324	3.78629	2.38592	2.31777	Fujiang
2010	-1.2147	6.49896	9.95366	2.24606	0.651624	4.32731	3.78555	3.99217	3.02027	1.87487	Jiangxi
2011	-0.925107	6.59293	10.1617	2.50424	0.741288	4.23787	3.8221	4.00207	3.08554	1.93398	Jiangxi
2012	-0.705333	6.49934	10.2619	2.41332	0.832521	4.29511	3.86094	3.98567	3.16012	1.88889	Jiangxi
2013	-0.504754	6.77469	10.3719	2.22546	0.929795	4.19976	3.88916	3.98116	3.18914	1.90925	Jiangxi
2014	-0.397772	6.77231	10.4623	2.01072	0.953721	4.25135	3.91641	3.96241	3.21009	1.97602	Jiangxi
2015	-0.377839	6.88959	10.5298	1.91452	1.00292	4.26183	3.94391	3.90931	3.26938	1.97144	Jiangxi
2016	-0.209083	6.98966	10.6189	1.80527	1.00825	4.23671	3.98864	3.86049	3.22327	1.98691	Jiangxi
2017	0.118801	7.02893	10.71	1.91337	1.00865	4.10413	4.02013	3.8444	3.23044	1.96949	Jiangxi
2018	0.0499573	7.15562	10.8265	1.56414	1.00491	4.11692	4.04909	3.79275	3.21683	2.05027	Jiangxi
2019	0.318588	7.22686	10.9082	1.53468	1.04148	4.21818	4.07887	3.78112	3.25393	2.11902	Jiangxi
2020	0.317517	7.27566	10.9517	1.70335	1.10986	4.22142	4.10155	3.76315	3.25372	2.14628	Jiangxi
2021	0.522984	7.35454	11.0979	1.93484	1.11077	4.2532	4.10429	3.79227	3.12354	2.17702	Jiangxi
2022	0.646937	7.69348	11.1419	2.43481	1.17803	4.29155	4.12826	3.80152	3.12337	2.19132	Jiangxi
2023	0.363545	7.98374	11.1732	3.53882	1.22378	4.45249	4.1452	3.75107	3.14818	2.20343	Jiangxi
2010	-0.122029	8.02051	10.4739	2.07623	1.25401	5.6865	3.69081	3.95652	2.503	2.09359	Shandong
2011	0.125463	8.06113	10.6071	2.29775	1.33569	5.66695	3.70911	3.93198	2.5498	2.12823	Shandong
2012	0.0590143	8.0694	10.6976	2.28971	1.35276	5.55625	3.72375	3.90254	2.62068	2.1177	Shandong
2013	0.188833	8.17443	10.7909	2.44919	1.37512	5.55121	3.74659	3.86638	2.64816	2.13641	Shandong
2014	0.278338	8.21369	10.8545	2.67219	1.38944	5.56157	3.77703	3.83851	2.64869	2.16459	Shandong
2015	0.298291	8.45212	10.9338	2.84544	1.42197	5.60727	3.86406	3.80404	2.70281	2.15964	Shandong
2016	0.415568	8.58097	10.984	2.98465	1.40046	5.65344	3.88736	3.77289	2.70132	2.18695	Shandong
2017	0.486153	8.54922	11.0478	2.94396	1.41262	5.68738	3.91359	3.75492	2.68737	2.22278	Shandong
2018	0.671913	8.67002	11.0995	2.73197	1.36999	5.72792	3.93255	3.72078	2.71836	2.24887	Shandong
2019	0.617926	8.68224	11.1534	2.64609	1.37923	5.82186	3.91499	3.6873	2.72294	2.27501	Shandong
2020	0.884523	8.66672	11.1791	2.41598	1.38291	5.86868	3.92035	3.66586	2.73638	2.21822	Shandong
2021	0.972595	8.73397	11.3082	2.39963	1.35597	5.90689	3.93183	3.67931	2.64855	2.25066	Shandong
2022	1.01416	8.88347	11.3633	2.65511	1.40539	5.91618	4.16729	3.69003	2.62984	2.27542	Shandong
2023	0.431597	8.90223	11.4164	3.0551	1.41099	6.0689	4.18251	3.66581	2.61495	2.31293	Shandong
2010	-0.287693	7.69247	10.0895	2.20358	0.828564	4.63025	3.65894	3.98405	2.7133	1.96529	Henan
2011	-0.0813867	7.85731	10.2334	2.54817	0.902049	4.64478	3.70056	3.97549	2.78153	1.98609	Henan
2012	-0.196362	7.87356	10.3217	2.47461	0.968336	4.62183	3.73743	3.95008	2.84991	1.96473	Henan
2013	-0.113876	7.95997	10.4056	2.37607	1.00151	4.59855	3.77506	3.92329	2.87059	2.00189	Henan
2014	0.180165	7.91201	10.487	2.34839	1.01351	4.61075	3.80777	3.90344	2.85857	2.00445	Henan
2015	0.146874	7.87284	10.5513	2.42229	1.03662	4.42077	3.85057	3.87945	2.90881	2.00754	Henan
2016	0.341219	7.88332	10.6253	2.62893	1.03295	4.38925	3.88732	3.85383	2.91879	1.99782	Henan
2017	0.572235	7.91558	10.7278	2.6591	1.03011	4.36016	3.92316	3.84408	2.90843	2.06217	Henan
2018	0.685557	8.02294	10.8322	2.31552	1.01132	4.41365	3.95585	3.78723	2.91556	2.11263	Henan
2019	0.776362	7.96843	10.9033	2.09258	1.0592	4.61957	3.98917	3.75847	2.94027	2.12441	Henan
2020	0.855305	7.97457	10.9115	2.01189	1.11558	4.62918	4.01512	3.71243	2.95057	2.10389	Henan
2021	0.80867	8.01931	10.9753	2.14769	1.10584	4.63541	4.02535	3.70332	2.82427	2.13203	Henan
2022	0.86037	8.34637	10.9836	2.37183	1.13778	4.62664	4.04428	3.72596	2.85371	2.1535	Henan
2023	0.136749	8.46357	11.0033	2.76905	1.16315	4.98388	4.06182	3.62437	2.94451	2.15258	Henan
2010	-0.815406	7.62217	10.2516	2.45646	0.896499	4.31562	3.90593	3.86597	2.73535	1.96683	Hubei
2011	-0.81427	7.64315	10.4523	2.80946	1.0337	4.31388	3.947	3.89123	2.78006	1.9932	Hubei
2012	-0.748897	7.68437	10.5733	2.80623	1.1305	4.3849	3.97462	3.8993	2.81199	1.9799	Hubei
2013	-0.537184	7.71301	10.6867	2.6454	1.22033	4.3429	3.99838	3.8433	2.84643	2.023	Hubei
2014	-0.506581	7.77583	10.7905	2.84267	1.26515	4.40183	4.02052	3.82991	2.86054	2.02894	Hubei
2015	-0.371359	7.75833	10.8565	2.99699	1.31775	4.45968	4.0462	3.8004	3.00623	2.0125	Hubei
2016	-0.212424	7.81562	10.9451	3.01381	1.33646	4.49714	4.07022	3.77403	2.9579	2.0586	Hubei
2017	-0.11163	7.8692	11.052	3.15547	1.3353	4.69702	4.09234	3.74247	2.90503	2.11926	Hubei
2018	0.0729176	7.95009	11.1707	2.87763	1.33111	4.76737	4.11087	3.73339	2.84912	2.17202	Hubei
2019	0.240283	7.9921	11.1921	2.95361	1.3834	4.81851	4.12439	3.71877	2.91958	2.18267	Hubei
2020	0.327112	8.01163	11.2782	2.7691	1.45409	4.82575	4.14138	3.61231	2.92234	2.15524	Hubei
2021	0.311034	8.09936	11.3612	2.66864	1.3947	4.86291	4.14313	3.65309	2.76244	2.16045	Hubei
2022	0.439233	8.32153	11.412	2.89928	1.50446	4.88507	4.1693	3.67702	2.60033	2.19177	Hubei
2023	0.444253	8.46655	11.4669	3.06719	1.51293	5.07204	4.18159	3.58978	2.81292	2.24474	Hubei
2010	-1.04335	7.11174	10.0734	2.62755	0.769052	3.99083	3.76815	3.8104	2.85372	1.96781	Hunan
2011	-1.0082	7.20534	10.2661	2.78641	0.888134	3.96215	3.80888	3.84942	2.92389	1.97227	Hunan
2012	-0.850061	7.13895	10.3791	2.67036	0.952305	3.88814	3.84267	3.84606	2.96644	1.90464	Hunan
2013	-0.67046	7.21195	10.4822	2.69545	1.03418	3.91602	3.87037	3.83628	2.99187	1.92702	Hunan
2014	-0.634241	7.1806	10.5751	2.74838	1.07097	3.98024	3.89752	3.82187	2.96456	1.96837	Hunan
2015	-0.527827	7.18083	10.6723	2.98999	1.11323	4.07159	3.33689	3.79281	2.9994	1.94819	Hunan
2016	-0.389491	7.23352	10.7487	3.01852	1.12105	4.20125	3.39763	3.7364	3.02267	1.93499	Hunan
2017	-0.249002	7.26869	10.8396	3.0378	1.15107	4.34808	3.51262	3.68359	3.01095	2.00377	Hunan
2018	-0.12845	7.33481	10.9106	2.82577	1.13477	4.47335	3.53782	3.64472	3.02472	2.09581	Hunan
2019	-0.0334776	7.35207	11.0035	2.74117	1.17101	4.59208	3.5536	3.65342	3.00268	2.16608	Hunan
2020	0.161005	7.34886	11.0432	2.68479	1.19401	4.67423	3.5852	3.64786	3.00706	2.10169	Hunan
2021	0.230937	7.46271	11.1423	2.81793	1.20603	4.762	3.59731	3.66492	2.9021	2.13381	Hunan
2022	0.375512	7.59873	11.183	3.09014	1.2695	4.8362	4.0995	3.6741	2.91791	2.16137	Hunan
2023	0.167279	7.84374	11.2372	3.28786	1.28093	4.9985	4.11349	3.62796	2.95304	2.16905	Hunan
2010	0.590968	8.08238	10.692	2.43991	1.50783	6.84328	4.19238	3.90963	2.46811	2.26571	Guangdong
2011	0.629446	8.24341	10.8065	2.65365	1.55796	6.87816	4.19825	3.89778	2.53746	2.29061	Guangdong
2012	0.756788	8.1868	10.8519	2.6688	1.57089	6.89329	4.20693	3.87056	2.56182	2.22538	Guangdong
2013	0.861901	8.26229	10.9234	2.46677	1.57461	6.91412	4.22083	3.849	2.59949	2.22397	Guangdong
2014	0.903054	8.28106	10.991	2.51598	1.54375	6.9523	4.22858	3.84668	2.59716	2.28595	Guangdong
2015	1.03465	8.30276	11.0665	2.6305	1.55445	7.01364	4.24147	3.81508	2.84287	2.29132	Guangdong
2016	1.12976	8.35788	11.1418	2.70214	1.53692	7.08747	4.25064	3.76597	2.79515	2.29616	Guangdong
2017	1.22462	8.41258	11.2317	2.62105	1.54535	7.21428	4.25901	3.73882	2.79775	2.32601	Guangdong
2018	1.25168	8.4542	11.3015	2.41055	1.52786	7.44406	4.27402	3.72379	2.75607	2.34612	Guangdong
2019	1.04879	8.52735	11.3675	2.42727	1.56315	7.49147	4.28565	3.69289	2.77374	2.40478	Guangdong
2020	1.17087	8.56138	11.3856	2.29867	1.58486	7.46964	4.30609	3.67546	2.75251	2.35042	Guangdong
2021	1.241	8.74929	11.4961	2.46741	1.57008	7.52593	4.31214	3.70218	2.6831	2.3618	Guangdong
2022	1.42525	8.98439	11.5347	2.62064	1.61194	7.54665	4.31468	3.71177	2.66275	2.38453	Guangdong
2023	0.873859	9.03824	11.5806	3.01236	1.6912	7.77486	4.32307	3.69197	2.62318	2.42851	Guangdong
2010	-1.32115	6.9394	9.80242	2.45795	0.515395	3.97537	3.57691	3.70173	3.15589	1.79642	Guangxi
2011	-1.14387	6.94608	9.98055	2.6674	0.608364	3.83945	3.62453	3.71788	3.20728	1.79973	Guangxi
2012	-1.11103	7.03262	10.0731	2.72708	0.681272	3.63046	3.66229	3.68481	3.27373	1.89582	Guangxi
2013	-0.914467	7.14351	10.161	2.79885	0.748617	3.62594	3.69886	3.63312	3.24943	1.90687	Guangxi
2014	-0.880902	7.17781	10.2476	2.99584	0.764956	3.67605	3.70249	3.63414	3.24297	1.87349	Guangxi
2015	-0.741976	7.17012	10.3246	3.38762	0.792065	3.74123	3.73397	3.59542	3.31323	1.86424	Guangxi
2016	-0.606955	7.20527	10.4098	3.54737	0.793489	3.80332	3.75829	3.55183	3.31636	1.91087	Guangxi
2017	-0.620247	7.24502	10.4984	3.39507	0.803411	3.88609	3.79147	3.54104	3.31747	2.01943	Guangxi
2018	-0.392966	7.46852	10.5885	3.04783	0.795795	3.9765	3.81349	3.52927	3.29795	2.05014	Guangxi
2019	-0.419874	7.52092	10.6603	2.71097	0.829791	4.08967	3.83598	3.50194	3.31603	2.02894	Guangxi
2020	-0.289534	7.58624	10.6936	2.32383	0.871897	4.18616	3.86255	3.46122	3.32988	2.0169	Guangxi
2021	-0.164001	7.64105	10.8207	2.27937	0.862833	4.25249	3.8678	3.51967	3.13695	2.04368	Guangxi
2022	-0.0507174	7.89284	10.8571	2.50504	0.919936	4.28717	4.01908	3.52595	3.10948	2.054	Guangxi
2023	0.10285	7.99384	10.8967	2.76083	0.941139	4.29414	4.03918	3.49062	3.11058	1.98376	Guangxi
2010	-2.59778	5.02821	10.0541	3.28131	0.743042	3.73074	3.90822	3.2643	3.35941	1.70675	Hainan
2011	-2.32063	5.15277	10.2286	3.5711	0.826845	3.38777	3.92197	3.30493	3.45346	1.80336	Hainan
2012	-2.14472	5.2575	10.3305	3.54866	0.932954	3.4356	3.94352	3.28792	3.48687	1.72241	Hainan
2013	-2.04757	5.44432	10.4302	3.3929	0.996648	3.4356	3.96537	3.18217	3.47976	1.7138	Hainan
2014	-1.98008	5.49942	10.5146	3.26237	1.02232	3.41378	3.98453	3.17653	3.46216	1.83673	Hainan
2015	-1.70131	5.56452	10.5844	3.08125	1.06128	3.43753	4.0057	3.16309	3.50229	1.82374	Hainan
2016	-1.68349	5.66202	10.6629	2.98328	1.06048	3.28091	4.03777	3.09565	3.51611	1.87518	Hainan
2017	-1.65631	5.70151	10.7423	2.86146	1.06325	3.1954	4.06113	3.09804	3.46904	1.9577	Hainan
2018	-1.47386	5.7788	10.8199	2.69828	1.04891	3.29843	4.07974	3.06549	3.53925	1.96613	Hainan
2019	-1.46397	5.84551	10.8889	2.48347	1.0737	3.50225	4.08379	3.01214	3.55149	1.88601	Hainan
2020	-1.56443	5.84508	10.9151	2.12885	1.10331	3.74573	4.09883	2.95817	3.56774	1.82455	Hainan
2021	-1.43418	5.9693	11.063	1.94566	1.09143	4.10611	4.10264	2.94849	3.41147	1.87211	Hainan
2022	-1.44618	6.02835	11.1169	2.50015	1.14143	4.27123	4.11887	2.95629	3.29697	1.90434	Hainan
2023	0.24544	6.23444	11.1982	2.48624	1.23148	4.47499	4.13453	2.95393	3.39768	1.78221	Hainan
2010	-1.00751	6.22315	10.2384	2.24728	0.928179	3.87681	3.51186	3.80521	3.05353	2.08704	Chongqing
2011	-1.01148	6.36676	10.4491	2.48598	1.04238	3.68512	3.64727	3.80639	3.23059	2.07594	Chongqing
2012	-0.762664	6.28507	10.5707	2.47765	1.11724	3.79796	3.67372	3.8238	3.26851	2.04083	Chongqing
2013	-0.775056	6.44577	10.6751	2.25186	1.21722	3.98843	3.68939	3.82796	3.15726	2.05258	Chongqing
2014	-0.564244	6.5159	10.7801	2.2562	1.26255	3.941	3.70507	3.8357	3.11777	2.09581	Chongqing
2015	-0.484402	6.52209	10.8638	2.32107	1.30618	3.91382	3.71975	3.80524	3.16295	2.10766	Chongqing
2016	-0.487301	6.55278	10.9674	2.46828	1.32607	4.01728	3.86337	3.7632	3.10027	2.14558	Chongqing
2017	-0.38843	6.59044	11.0639	2.87063	1.34259	4.04987	3.87714	3.74089	3.07315	2.20387	Chongqing
2018	-0.260357	6.68402	11.131	2.66585	1.35339	4.14298	3.88456	3.71253	3.04613	2.2514	Chongqing
2019	-0.129544	6.69895	11.2124	2.76809	1.39532	4.1523	3.89409	3.68354	3.02218	2.22958	Chongqing
2020	-0.0148523	6.73402	11.2649	2.62401	1.41438	4.20752	3.89721	3.68418	2.97264	2.18279	Chongqing
2021	-0.0214567	6.89915	11.3784	2.51382	1.41501	4.23019	3.90343	3.68767	2.8461	2.1601	Chongqing
2022	0.166828	6.93724	11.3964	2.91047	1.49122	4.23931	4.26212	3.6925	2.82124	2.21659	Chongqing
2023	0.687506	7.32514	11.4521	3.22441	1.50408	4.27178	4.27207	3.65864	2.8677	2.21441	Chongqing
2010	0.00575575	7.49255	9.97164	1.92311	0.646236	4.79165	3.26443	3.87305	3.20761	2.00026	Sichuang
2011	0.129264	7.5912	10.1699	2.44195	0.748327	4.60777	3.30274	3.86225	3.10044	2.03497	Sichuang
2012	0.1665	7.6021	10.2951	2.35747	0.850497	4.51163	3.31827	3.84904	3.12615	1.96767	Sichuang
2013	0.233431	7.87526	10.3952	2.29146	0.937943	4.51601	3.36122	3.84657	3.15526	2.0177	Sichuang
2014	0.265952	8.0325	10.4772	2.48978	0.986986	4.63016	3.38145	3.81292	3.15805	2.00566	Sichuang
2015	0.400079	8.04879	10.5192	2.64033	1.02623	4.66287	3.421	3.77229	3.20721	2.00593	Sichuang
2016	0.586537	8.09372	10.6007	2.80787	1.02313	4.6415	3.49062	3.70346	3.18503	1.99674	Sichuang
2017	0.582784	8.1549	10.7305	2.87691	0.998034	4.74162	3.53207	3.64899	3.13281	2.07919	Sichuang
2018	0.807023	8.21257	10.8505	2.59433	0.986728	4.82847	3.57975	3.62239	3.11915	2.11517	Sichuang
2019	0.768975	8.27484	10.9245	2.68696	1.06193	4.86368	3.60496	3.61286	3.10546	2.15106	Sichuang
2020	0.793062	8.33861	10.9672	2.5718	1.13387	4.9086	3.64466	3.58609	3.13936	2.09605	Sichuang
2021	1.10256	8.41855	11.0761	2.57719	1.12705	4.99267	3.65325	3.60777	3.03187	2.14617	Sichuang
2022	1.1349	8.55493	11.1214	2.93318	1.19347	5.00515	4.06732	3.61849	2.94799	2.19789	Sichuang
2023	1.11515	8.68932	11.1816	3.1698	1.20237	5.06954	4.08581	3.56763	3.05271	2.20387	Sichuang
2010	-1.78993	7.23391	9.47189	1.66408	0.170989	2.96321	3.52076	3.6961	3.58637	1.64191	Guizhou
2011	-1.62728	7.2293	9.67459	1.66321	0.284584	3.01013	3.5562	3.6945	3.69029	1.72455	Guizhou
2012	-1.39424	7.34498	9.84141	1.29428	0.350743	2.82613	3.59182	3.69624	3.71045	1.65154	Guizhou
2013	-1.32591	7.42543	9.99663	1.23952	0.44266	2.62901	3.63469	3.68314	3.65489	1.67635	Guizhou
2014	-1.08967	7.46604	10.1245	1.74447	0.533251	2.718	3.69486	3.66493	3.65381	1.48183	Guizhou
2015	-0.979246	7.50384	10.2551	1.7799	0.627668	2.81061	3.76027	3.64284	3.62095	1.42021	Guizhou
2016	-0.831229	7.55171	10.3539	1.77201	0.670439	2.71536	3.81903	3.63481	3.58754	1.51995	Guizhou
2017	-0.633975	7.54914	10.485	1.43811	0.733927	2.81601	3.86619	3.5983	3.52348	1.67672	Guizhou
2018	-0.462835	7.60886	10.6009	1.5464	0.739935	2.93969	3.90278	3.57972	3.4892	1.75371	Guizhou
2019	-0.323426	7.69919	10.6823	1.35113	0.816455	3.41969	3.94119	3.57262	3.5688	1.70638	Guizhou
2020	-0.314381	7.74303	10.7428	1.69278	0.884281	3.46072	3.97312	3.55724	3.46996	1.71686	Guizhou
2021	-0.201141	7.76997	10.83	0.653327	0.884911	3.55191	3.98155	3.5612	3.35786	1.88934	Guizhou
2022	-0.215541	7.98827	10.8571	2.51814	0.969081	3.57851	3.98898	3.56317	3.36754	1.95289	Guizhou
2023	0.26436	8.14693	10.9004	3.06161	0.975993	3.23858	4.02428	3.55422	3.38979	1.99932	Guizhou
2010	0.134362	7.21893	9.72964	2.83642	0.477698	3.64623	3.54681	3.74346	3.38606	1.78541	Yunnan
2011	0.636426	7.34928	9.93367	3.17631	0.561502	3.66842	3.5995	3.68945	3.42632	1.82294	Yunnan
2012	0.535988	7.33557	10.0843	3.10135	0.6085	3.67782	3.65013	3.69325	3.47177	1.76985	Yunnan
2013	0.438101	7.68731	10.2268	2.95921	0.701735	3.75232	3.68866	3.66327	3.46387	1.77343	Yunnan
2014	0.669943	7.84385	10.3149	2.86311	0.776119	3.70031	3.71894	3.64518	3.45334	1.77834	Yunnan
2015	0.805922	7.84502	10.3761	2.88106	0.857883	3.66382	3.75966	3.60303	3.45008	1.78104	Yunnan
2016	0.935925	7.89824	10.4631	2.87137	0.86078	3.7104	3.79872	3.55853	3.42298	1.71596	Yunnan
2017	0.992637	7.99127	10.5813	2.76474	0.854869	3.77643	3.83475	3.53153	3.4309	1.68194	Yunnan
2018	0.741948	8.08363	10.701	2.42418	0.849099	3.77115	3.85942	3.54976	3.37054	1.76147	Yunnan
2019	0.955194	8.15065	10.805	2.27608	0.91272	4.02571	3.88493	3.54696	3.37251	1.70092	Yunnan
2020	0.937776	8.20916	10.8591	2.13919	0.984351	4.10462	3.91287	3.53097	3.34642	1.65173	Yunnan
2021	1.09765	8.23489	10.9667	2.18034	1.00756	4.11578	3.92039	3.55857	3.19563	1.73941	Yunnan
2022	1.22679	8.34637	11.017	2.33773	1.08536	4.14662	3.94584	3.58808	3.14152	1.76285	Yunnan
2023	0.096499	8.65362	11.0682	2.89393	1.1314	4.17592	3.96878	2.74493	3.10989	1.92673	Yunnan
2010	-1.16203	7.01415	10.1796	2.93418	0.85457	3.9849	3.82216	3.94182	3.11517	1.60824	Shaanxi
2011	-0.982721	7.10863	10.384	3.29274	0.961614	4.05439	3.85772	3.97516	3.18106	1.61184	Shaanxi
2012	-0.907528	7.19331	10.5279	3.29406	1.05843	4.09151	3.90646	3.98576	3.1571	1.76832	Shaanxi
2013	-0.807762	7.32118	10.6409	2.98749	1.15205	4.16558	3.94308	3.96888	3.13736	1.78322	Shaanxi
2014	-0.748385	7.39066	10.7249	3.0637	1.21978	4.21686	3.97063	3.95077	3.12543	1.64152	Shaanxi
2015	-0.524227	7.39203	10.748	3.0168	1.27198	4.09717	4.00245	3.87968	3.19659	1.69562	Shaanxi
2016	-0.565906	7.4716	10.8029	2.73984	1.27079	4.08648	4.0325	3.8451	3.13751	1.75492	Shaanxi
2017	-0.377732	7.50331	10.9152	3.23444	1.22685	4.03052	4.06163	3.85228	3.11386	1.91117	Shaanxi
2018	-0.320338	7.52596	11.0171	3.06423	1.18893	4.07005	4.08856	3.84682	3.09771	1.98004	Shaanxi
2019	-0.165016	7.69312	11.0883	3.10545	1.2466	4.12228	4.1155	3.82142	3.09877	2.0121	Shaanxi
2020	-0.0399767	7.77461	11.094	2.99715	1.30047	4.14107	4.13764	3.76441	3.12661	2.0628	Shaanxi
2021	-0.00954168	7.91562	11.2409	2.88954	1.29083	4.26014	4.14313	3.84034	3.00315	2.12094	Shaanxi
2022	0.00788578	8.13484	11.3266	3.17348	1.3203	4.30298	4.1592	3.88397	3.18595	2.14523	Shaanxi
2023	0.422137	8.43765	11.3551	3.42512	1.335	4.40193	4.19208	3.86201	3.05654	2.11577	Shaanxi
2010	-1.89629	6.67397	9.64245	2.92762	0.382509	3.05211	3.58685	3.88036	3.61735	1.62354	Gansu
2011	-1.70011	6.93527	9.84559	3.1426	0.444269	3.08053	3.61496	3.86098	3.61595	1.68566	Gansu
2012	-1.62473	6.98767	9.95937	2.95618	0.521309	3.11883	3.65713	3.83366	3.64254	1.6184	Gansu
2013	-1.43648	7.09169	10.0735	2.80769	0.613663	3.10414	3.69212	3.79457	3.64808	1.61919	Gansu
2014	-1.12957	7.12378	10.1564	2.76826	0.651208	3.12764	3.73002	3.76845	3.66329	1.42552	Gansu
2015	-0.957411	7.12448	10.1654	2.88541	0.704569	3.05871	3.76561	3.64315	3.80932	1.42142	Gansu
2016	-0.881141	7.10195	10.2187	2.79736	0.702275	3.03447	3.79997	3.58217	3.81992	1.4495	Gansu
2017	-0.880178	7.20723	10.2782	2.6286	0.644171	3.02578	3.8373	3.53487	3.80755	1.52323	Gansu
2018	-0.739205	7.33396	10.3804	2.21598	0.604773	3.15359	3.86472	3.52861	3.84047	1.59656	Gansu
2019	-0.767102	7.39664	10.4559	2.04745	0.609615	3.24025	3.88136	3.49141	3.81387	1.69102	Gansu
2020	-0.679178	7.4744	10.4886	1.92988	0.663828	3.23159	3.95566	3.44864	3.83654	1.76661	Gansu
2021	-0.564748	7.54793	10.6229	2.15718	0.658454	3.17639	3.9765	3.51901	3.67469	1.93946	Gansu
2022	-0.610194	7.69837	10.7055	2.39713	0.71492	3.01406	3.9925	3.56156	3.6392	1.98417	Gansu
2023	0.221289	7.78524	10.7769	2.83728	0.741937	3.12292	4.0162	3.53797	3.63986	1.88449	Gansu
2010	-1.31634	6.14902	9.91952	2.74279	0.678543	1.60744	3.80041	3.65898	4.17394	1.42696	Qinghai
2011	-1.53349	6.13801	10.0911	2.56581	0.721046	1.54969	3.83346	3.69785	4.257	1.53751	Qinghai
2012	-1.20535	6.32131	10.195	2.95309	0.798378	1.24415	3.8595	3.70317	4.32848	1.50829	Qinghai
2013	-0.814835	6.41523	10.3091	2.89743	0.859146	1.30833	3.88182	3.68256	4.27218	1.49425	Qinghai
2014	-0.844867	6.36358	10.3759	2.87755	0.886834	1.28923	3.90752	3.65548	4.28943	1.31157	Qinghai
2015	-1.01233	6.33859	10.4589	2.83374	0.940165	1.39624	3.918	3.63355	4.32206	1.21521	Qinghai
2016	-0.338357	6.31529	10.5662	2.99426	0.92185	1.4816	3.94409	3.64869	4.21247	1.27088	Qinghai
2017	-0.233464	6.44029	10.647	2.72063	0.937693	1.54756	3.97155	3.67834	4.12849	1.3955	Qinghai
2018	-0.604327	6.69831	10.7539	2.41318	0.952219	1.64673	3.99762	3.68386	4.09351	1.31882	Qinghai
2019	-0.807627	6.78687	10.8168	2.26034	0.978446	1.70111	4.0168	3.66953	4.14893	1.42094	Qinghai
2020	-0.285517	6.85851	10.8348	1.95949	1.03733	1.8916	4.09568	3.63713	4.16229	1.55793	Qinghai
2021	-0.402889	6.90346	10.9506	1.92981	1.01933	1.99334	4.09767	3.69672	4.00341	1.65058	Qinghai
2022	-0.456216	7.31213	11.017	2.16112	1.06108	1.98513	4.1179	3.78246	4.00205	1.66959	Qinghai
2023	0.39574	7.78573	11.0651	2.6441	1.1314	2.08939	4.13996	3.74839	4.05371	1.55751	Qinghai
2010	-1.5862	6.3753	10.1198	1.7304	0.808356	1.66582	3.87037	3.84295	3.56877	1.72134	Ningxia
2011	-1.30298	6.84513	10.3027	2.82153	0.904469	1.75613	3.91601	3.86312	3.59845	1.75059	Ningxia
2012	-0.664356	6.91364	10.384	2.80866	0.99864	1.56025	3.93476	3.84105	3.70281	1.70037	Ningxia
2013	-0.837574	7.00738	10.4617	2.7209	1.07073	1.58515	3.96727	3.81809	3.6796	1.7563	Ningxia
2014	-0.703038	7.05321	10.5047	2.83701	1.0758	1.68269	4.00405	3.80706	3.69982	1.67616	Ningxia
2015	-0.67713	7.05186	10.5377	3.16546	1.09272	1.76473	4.0427	3.76808	3.78732	1.61323	Ningxia
2016	-0.578589	7.04262	10.5971	3.04065	1.05066	1.87334	4.07312	3.74748	3.80898	1.60503	Ningxia
2017	-0.157766	7.23052	10.7231	2.73959	1.0165	1.99877	4.11005	3.78267	3.75876	1.70329	Ningxia
2018	-0.276482	7.38397	10.8085	2.57639	0.983164	2.03078	4.12955	3.747	3.69949	1.78909	Ningxia
2019	-0.0794542	7.47646	10.8644	2.37631	1.05458	2.195	4.15309	3.74572	3.64727	1.83338	Ningxia
2020	-0.362737	7.54028	10.9128	2.21025	1.09189	2.19611	4.17374	3.71801	3.62215	1.91766	Ningxia
2021	-0.292891	7.64151	11.0554	2.14714	1.06695	2.20827	4.17439	3.82324	3.43788	1.99592	Ningxia
2022	-0.343275	7.77124	11.1605	2.26894	1.13907	2.15756	4.19479	3.87763	3.50616	2.0157	Ningxia
2023	0.39372	7.84723	11.1982	2.15038	1.16315	2.11142	4.2485	3.8458	3.36031	1.88586	Ningxia
2010	-0.448529	6.52109	10.1077	1.99837	0.861471	2.86277	3.76143	3.83435	3.45616	1.69873	Xinjiang
2011	-0.671836	6.77443	10.2873	2.43631	0.872261	2.52333	3.77803	3.85773	3.5546	1.71829	Xinjiang
2012	0.0417491	6.95807	10.4012	2.58473	0.986583	2.57338	3.78918	3.80384	3.60275	1.55138	Xinjiang
2013	0.280761	7.41927	10.5113	2.37995	1.05537	2.56649	3.80533	3.72482	3.59856	1.55625	Xinjiang
2014	0.025002	7.64536	10.5928	2.4467	1.09299	2.584	3.84567	3.72166	3.57828	1.32761	Xinjiang
2015	0.407883	7.81561	10.5719	2.38357	1.14236	2.62756	3.88732	3.61166	3.7107	1.26356	Xinjiang
2016	0.082045	7.90807	10.5882	2.54851	1.13873	2.69056	3.92039	3.57745	3.76048	1.21164	Xinjiang
2017	0.438854	8.00995	10.7144	2.46275	1.0507	2.82078	3.94932	3.6029	3.72696	1.27536	Xinjiang
2018	0.755663	8.09659	10.8363	2.25726	0.974265	2.8088	3.98917	3.59341	3.66692	1.40512	Xinjiang
2019	0.805955	8.20808	10.8806	2.29189	1.04585	2.96114	4.01656	3.56067	3.66594	1.58145	Xinjiang
2020	0.788028	8.32406	10.8834	1.90663	1.11965	2.99273	4.03477	3.54629	3.69121	1.49245	Xinjiang
2021	0.501483	8.42904	11.0509	1.69457	1.08315	2.97808	4.04305	3.65319	3.49541	1.66639	Xinjiang
2022	0.731059	8.67492	11.152	2.12046	1.10971	2.97502	4.05854	3.71318	3.4743	1.67147	Xinjiang
2023	0.284288	8.90836	11.2091	2.47402	1.1314	3.42198	4.0816	3.69668	3.45412	1.69525	Xinjiang
